# Supplementary material
Source: publisher site journal article supplement (https://www.dovepress.com/article/344369)
Supplement: Supplementary file 1 [file get_supplementary_file.php]

## QUESTIONNAIRE

English language version followed by the original French language version

\*Mandatory question

**In which semester did you enter in a department of Urology as resident? \***

**What is your University Hospital of affiliation? \***

**How many semesters of urology have you completed? \***

- 1
- 2
- 3
- 4
- 5
- 6

**How many semesters of urology have you completed in a department practicing robotic surgery? \***

- 1
- 2
- 3
- 4
- 5
- 6

**If, you are fellow, in which semester are you?**

- 1
- 2
- 3
- 4
- 5

- 6
- I am not concerned, (I am resident)

**How many residents are there, on average, in your university urology department? \***

**Have you had laparoscopic training, in the broadest sense, on a simulator? \***  
several answers possible

- Pelvitainer
- Simbionix
- No
- Other :

Please specify your remarks, comments, or clarifications to this question:

**If yes, for how many hours? \***

Since the beginning of your residency

**Do you have a surgical school in your area for this training? \***

Yes

Yes, but no access possible

No

Please specify your remarks, comments, or clarifications to this question:

**Please specify where robotic surgery is practiced in your region? \***

Several answers possible

- University hospital
- Regional hospital
- General hospital
- Private hospital
- no
- Other :

**Where do you perform as bedside surgeon for robotic surgery? \***

Several answers possible

- University hospital
- Regional hospital

- General hospital
- Private hospital
- no
- other :

**What type of robot is in your centre? \***

Several answers possible

- Da Vinci S
- Da Vinci Si
- Da Vinci Xi
- 1 console
- 2 consoles
- I don't know

**How many half-days per week does your department have for robotic activity? \***

**Do other specialties have access to the robot in your centre? \***

Several answers possible

- General surgery (digestive surgery)
- Pediatric surgery
- Gynaecology
- Vascular surgery
- ENT
- Other :

**What do you think about learning robotic surgery during residency and fellowship? \***

It is essential

It is useful, but not required

It is useless

**Do you think that a specific training for bedside surgeons in robotic surgery is mandatory? \***

Yes

No

**If yes, who should promote this training? \***

University  
AFU and AFUF  
Intuitive Surgical

Other:

**What would be, according to you, in days, the ideal duration of such a training? \***

**When would this training be appropriate? \***

- 1st year of residency
- 2<sup>nd</sup> year of residency
- 3rd year of residency
- 4th year of residency

**Where would you be able to go for such a training? \***

Several answers possible

- your own University hospital
- national expert centre
- european expert centre

**In which semester did you start to assist as bedside surgeon? \***

- 1   2   3   4   5   6   7   8   9   10
- 

**Were you accompanied the first time you assisted in robotic surgery? \***

Yes

No

**As a rule, when you assist, is there a senior with you alongside the patient? \***

Yes, always

Yes, often, or sometimes

No, never

**Does the organization of the department allow to be 2 residents in the operating room? (for robotic surgery) \***

Yes, very often

Yes, exceptionally

No

**Does the principal surgeon require residents to have prior assistant experience for conventional laparoscopic surgery? \***

Yes

No

**Does the principal surgeon require residents to have prior assistant experience for robotic surgery? \***

Yes

No

**How many robotic procedures have you assisted so far? \***

0-10

11-20

21-30

More than 30

**How many procedures seem necessary to feel comfortable as bedside surgeon? \***

**Do you think that prior bedside surgeon experience is useful to become console surgeon in robotic surgery? \***

Yes, useful, and vital nowadays

Yes, useful

No, it is not essential

No, it is useless

**What advantage(s) do you see in having experience as bedside surgeon before becoming console surgeon? \*\***

**Did you experience any difficulties when assisting at the robot? If yes, what were they? \***

**When you are bedside surgeon, do you use specific verbal communication with console surgeon (because he is far away and cannot see your gestures)? \***

Yes

No

It depends on the operator

**If you think that the role of bedside surgeon requires specific learning and skill acquisition, what would they be based on your experience? \***

Skills common to robotic and conventional laparoscopic surgery (tips and tricks ...)

An empty rectangular text box with a light gray background and a thin black border. It has a vertical scrollbar on the right side and a horizontal scrollbar at the bottom, indicating it is a scrollable area for text input.

**If you think that the role of bedside surgeon requires specific learning and skill acquisition, what would they be based on your experience? \***

Specific robotics skills (tips and tricks ...)

An empty rectangular text box with a light gray background and a thin black border. It has a vertical scrollbar on the right side and a horizontal scrollbar at the bottom, indicating it is a scrollable area for text input.

**Before being console surgeon, do you think it is necessary to: \***

tick what seems right to you

- Have experience as a bed-side surgeon
- Attend Intuitive Surgical's two-day training course
- Take a more in-depth training course
- Completion of a university degree course

Other:

**At what point in your residency and fellowship training do you think it "makes sense" to move to console for certain parts of the procedure? \***

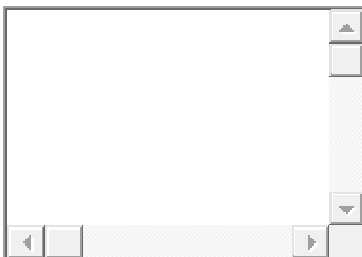An empty rectangular text box with a light gray background and a thin black border. It has a vertical scrollbar on the right side and a horizontal scrollbar at the bottom, indicating it is a scrollable area for text input.

**At what point in your residency and fellowship training do you think it is "reasonable" to move to console for a FULL "easy" procedure? \***

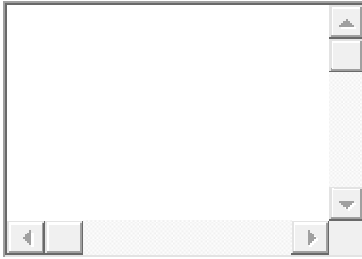

**In your centre, what was the training of the console surgeons? \***

Several answers possible

- None
- Intuitive Surgical at IRCAD (Strasbourg) or EEC (Paris)
- University Degree (Lyon, Nancy, Nice or Tours)
- I don't know

**Are there any training requirements in your centre before starting as robot surgeon? \***

Yes

No

I don't know

**French language version:**

\*Question obligatoire

**En quel semestre d'internat avez-vous intégré l'urologie ? \***

**A quel CHU êtes-vous affilié \***

**Combien de semestre d'urologie avez-vous validé ? \***

- 1
- 2

- 3
- 4
- 5
- 6

**Combien de semestre d'urologie avez-vous réalisé dans un service pratiquant la chirurgie robotique ? \***

- 1
- 2
- 3
- 4
- 5
- 6

**Si vous êtes assistant ou chef de clinique, en quel semestre êtes-vous ? \***

- 1
- 2
- 3
- 4
- 5
- 6
- je ne suis pas concerné, (interne des Hôpitaux)

**Combien y a-t-il d'internes, en moyenne, dans votre service d'urologie ? \***

**Avez-vous eu un entraînement coelioscopique, au sens large du terme, sur simulateurs ? \***

Plusieurs réponses possibles

- Pelvitainer
- Simbionix
- Non
- autre :

Merci de préciser vos remarques, commentaires ou précisions à cette question :



**Si oui, pendant combien d'heures ? \***

Depuis le début de votre internat

**Avez-vous une Ecole de Chirurgie dans votre région pour cette formation ? \***

Oui

Oui, mais pas d'accès possible

Non

Merci de préciser vos remarques, commentaires ou précisions à cette question :

**Etes-vous dans une région où la chirurgie robotique est implantée ? \***

plusieurs réponses possibles

- CHU
- CHR
- CH
- Clinique privée
- non
- autre :

**Quels sont les terrains de stage où vous avez un rôle de bed-side surgeon (assistant opératoire) au robot ? \***

plusieurs réponses possibles

- CHU
- CHR
- CH
- Clinique privée
- non
- autre :

**De quel type de robot dispose votre centre ? \***

Plusieurs réponses possibles

- Da Vinci S
- Da Vinci Si
- Da Vinci Xi
- 1 console

- 2 consoles
- ne sait pas

**Combien de demi-journées hebdomadaires votre service dispose-t-il pour l'activité robotique ? \***

**D'autres spécialités ont-elles accès au robot dans votre établissement ? \***  
plusieurs réponses possibles

- Chirurgie digestive
- Chirurgie pédiatrique
- Gynécologie
- Chirurgie vasculaire
- ORL
- Autre :

**Pensez-vous que l'apprentissage de la chirurgie robotique pendant l'internat et l'assistantat est : \***

Indispensable

Utile, mais non obligatoire

Inutile

**Pensez-vous que la formation de l'aide opératoire en chirurgie robotique est obligatoire ? \***

oui

non

**Si oui, qui doit superviser cela ? \***

L'Université

AFU et AFUF

Intuitive Surgical

Autre :

**Quelle serait, selon vous, la durée idéale d'une telle formation ? \***

**En quelle année d'internat pensez-vous que cette formation aurait sa place ? \***

- 1<sup>ère</sup> année d'internat
- 2<sup>ème</sup> année d'internat

- 3<sup>ème</sup> année d'internat
- 4<sup>ème</sup> année d'internat

**Où seriez-vous prêts à vous déplacer pour une telle formation (plusieurs réponses possibles) ? \***

Plusieurs réponses possibles

- votre propre CHU-Université
- un centre national expert
- un centre européen expert

**En quel semestre avez-vous commencé l'aide opératoire robotique ? \***

- 1   2   3   4   5   6   7   8   9   10
- 

**Avez-vous été accompagné la première fois que vous avez aidé au robot ? \***

Oui

Non

**En règle générale, quand vous aidez, y a-t-il un sénior avec vous aux côtés du malade ? \***

Oui, toujours

Oui, souvent ou parfois

Non, jamais

**L'organisation du service permet-elle d'être 2 internes en salle (pour la chirurgie robotique) ? \***

Oui, très souvent

Oui, exceptionnellement

non

**L'opérateur principal demande-t-il que vous ayez une expérience préalable avant que vous ne soyez aide principal en coelioscopie ? \***

Oui

Non

**L'opérateur principal demande-t-il que vous ayez une expérience préalable avant que vous ne soyez aide principal au robot ? \***

Oui

Non

**Combien d'interventions avec assistance robotique avez-vous aidé jusqu'ici ? \***

0-10

11-20  
21-30  
Plus de 30

**En combien de gestes vous êtes-vous senti à l'aise pour aider au robot ? \***

**Pensez-vous qu'avoir été aide opératoire en chirurgie robotique est utile lors du passage à la console en tant qu'opérateur ? \***

Oui, indispensable aujourd'hui

Oui, utile

Non, pas indispensable

Non, c'est inutile

**Quel(s) avantage(s) voyez-vous au fait d'avoir une expérience comme aide-opératoire avant de passer au rôle d'opérateur à la console ? \***



**Avez-vous éprouvé des difficultés lors d'aides opératoires au robot ? Si oui, de quel ordre ? \***



**Quand l'opérateur est à la console, utilisez-vous une communication verbale spécifique avec lui du fait qu'il est éloigné et ne voit pas vos gestes ? \***

Oui

Non

Ça dépend de l'opérateur

**Si vous pensez que le rôle d'aide opératoire au robot nécessite un apprentissage spécifique et l'acquisition d'habiletés particulières, quelles seraient-elles en vous basant sur votre expérience, ? \***

Habiletés communes à la robotique et à la cœlioscopie standard (trucs et astuces ...)

**Si vous pensez que le rôle d'aide opératoire au robot nécessite un apprentissage spécifique et l'acquisition d'habiletés particulières, quelles seraient-elles en vous basant sur votre expérience, ? \***

Habiletés spécifiques à la robotique (trucs et astuces ...)

**Avant de passer comme opérateur principal à la console pensez-vous qu'il faille : \***

cochez ce qui vous semble juste

- Avoir une expérience de bed-side surgeon
- Suivre la formation d'Intuitive Surgical de deux jours
- Suivre une formation plus approfondie
- Suivre une formation diplômante universitaire
- Autre :

**A quel moment de votre cursus d'interne et de post-internat pensez-vous « raisonnable » de passer comme opérateur à la console pour certaines parties d'intervention ? \***

**A quel moment de votre cursus d'interne et de post-internat pensez-vous « raisonnable » de passer comme opérateur à la console pour une intervention complète simple ?**



**Dans votre centre, quelle a été la formation de vos opérateurs séniors ? \***  
plusieurs réponses possibles

- aucune
- Intuitive Surgical à l'IRCAD ou l'EEC
- D.I.U. ( Lyon, Nancy, Nice ou Tours)
  
- ne sait pas

**Y a-t-il dans votre centre des exigences de formation avant de débiter comme opérateur au robot ? \***

Oui

Non

Ne sait pas
